# Supplementary material for: Hybrid polymer and low molecular weight gels – dynamic two-component soft materials with both responsive and robust nanoscale networks
Source: Royal Society of Chemistry journal article supplement (doi:10.1039/c3sm51967h), 2013-01-01
Supplement: c3sm51967h.pdf [file c3sm51967h.pdf]

# Hybrid Gels – Dynamic Self-Assembly Pathways in Two-Component Nanomaterials with both Responsive and Robust Nanoscale Networks

Daniel Cornwell, Babatunde O. Okesola and David K Smith\*

Department of Chemistry, University of York, Heslington, York, YO10 5DD

## SUPPLEMENTARY INFORMATION

### Contents

1. General Experimental Methods
2. Images of Gels
3.  $T_{\text{gel}}$  data
4.  $^1\text{H}$  NMR of Gels
5. Avrami Plots
6. CD Spectra
7. References

## 1. General Experimental Methods.

All compounds required in the synthesis were purchased from standard commercial suppliers.  $^1\text{H}$  and  $^{13}\text{C}$  NMR spectra were recorded on a Jeol 400 spectrometer ( $^1\text{H}$  400 MHz,  $^{13}\text{C}$  100 MHz). A Bruker 500 ( $^1\text{H}$  500 MHz) was used for kinetics experiments. Samples were recorded as solutions in deuterated NMR solvents as stated and chemical shifts ( $\delta$ ) are quoted in parts per million. Coupling constant values ( $J$ ) are given in Hz. The level of assignment of  $^1\text{H}$  NMR spectra was achieved using model compounds, literature data and standard knowledge of  $^1\text{H}$  NMR. DEPT experiments were used to assist in the assignment of  $^{13}\text{C}$  NMR spectra. Positive and negative ion electrospray mass spectra were recorded on a Bruker Daltonics MicroTOF mass spectrometer. IR spectra were recorded on a PerkinElmer Spectrum Two FT-IR spectrometer. Melting points were measured on a Stuart SMP3 melting point apparatus and are uncorrected. Circular dichroism spectra were recorded on a Jasco J810 CD spectrophotometer – concentrations were below the gelation threshold.  $T_{\text{gel}}$  values were recorded using a high precision thermoregulated oil bath. SEM was carried out on a LEO 1530 Gemini FEGSEM fitted with an Oxford Instruments 80mm X-Max SDD detector.

## 2. Images of Gels

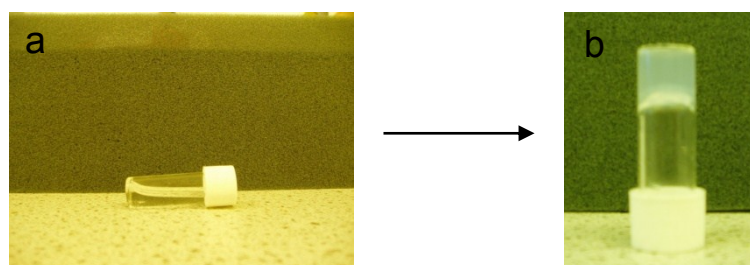

**Figure S1.** Formation of DBS- $\text{CO}_2\text{H}$  hydrogel. Clear solution a) changes to translucent gel b) with decrease in pH brought about by hydrolysis of GdL.

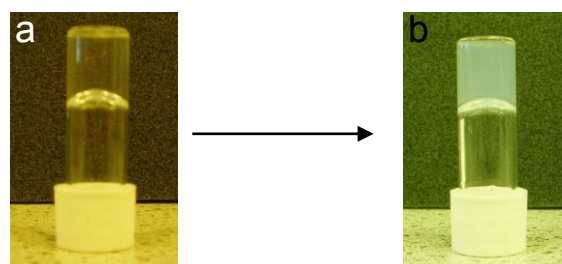

**Figure S2.** Formation of DBS- $\text{CO}_2\text{H}$ /agarose hybrid gel. The change from clear gel a) to translucent gel b) indicates formation of DBS- $\text{CO}_2\text{H}$  gelator network within agarose network.

### 3. $T_{\text{gel}}$ data

**Table 1**  $T_{\text{gel}}$  data for DBS-CO<sub>2</sub>H and hybrid gels. “>100” signifies that the gel remained stable over the boiling point of the solvent; the collapse of the gel after this point can be attributed to the boiling of the solvent rather than a breakdown of the gel network.

| % wt/vol<br>DBS-CO <sub>2</sub> H | $T_{\text{gel}} / ^\circ\text{C}$ |                |                |                |
|-----------------------------------|-----------------------------------|----------------|----------------|----------------|
|                                   | DBS-CO <sub>2</sub> H gel         |                | Hybrid gel     |                |
|                                   | 6 mg GdL                          | 8 mg GdL       | 6 mg GdL       | 8 mg GdL       |
| 0.15                              | <b>39</b>                         | <b>&gt;100</b> | <b>&gt;100</b> | <b>&gt;100</b> |
| 0.20                              | <b>47</b>                         | <b>&gt;100</b> | <b>&gt;100</b> | <b>&gt;100</b> |
| 0.25                              | <b>54</b>                         | <b>&gt;100</b> | <b>&gt;100</b> | <b>&gt;100</b> |
| 0.30                              | <b>&gt;100</b>                    | <b>&gt;100</b> | <b>&gt;100</b> | <b>&gt;100</b> |

#### 4. $^1\text{H}$ NMR spectra of gels

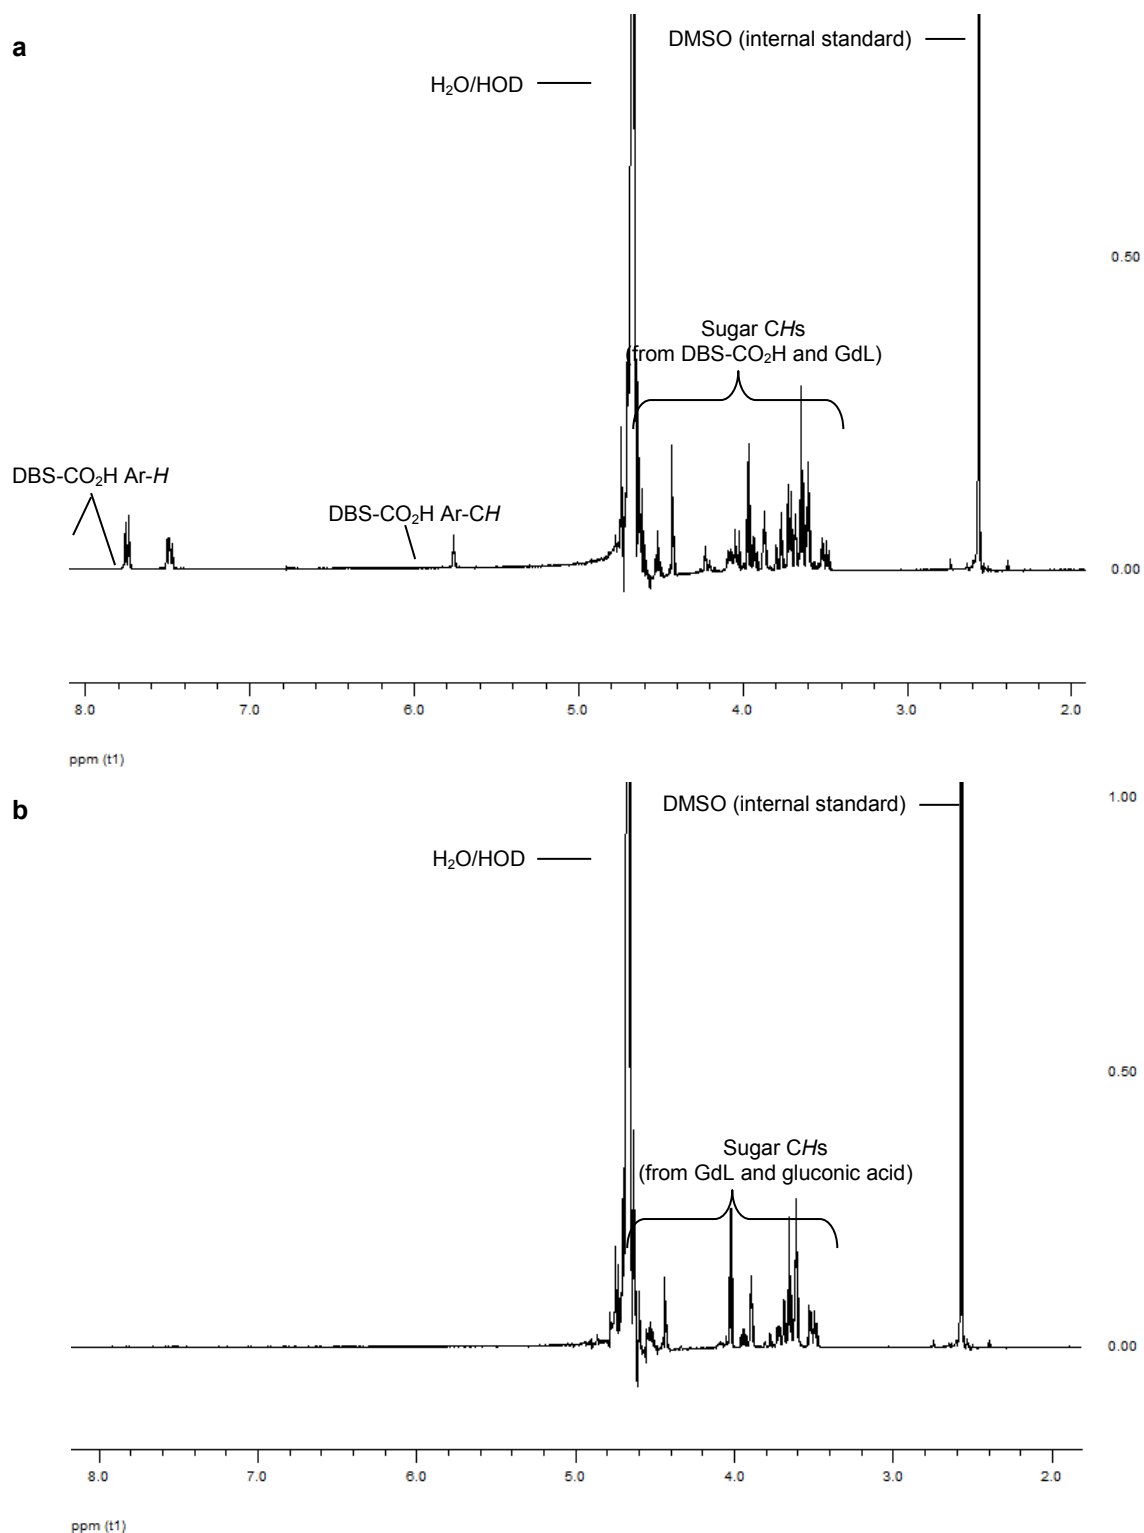

**Figure S3.**  $^1\text{H}$  NMR spectra (400 MHz,  $\text{D}_2\text{O}$ ) of DBS- $\text{CO}_2\text{H}$  gel (0.2% wt/vol) at (a) start of gelation and (b) end of gelation; the absence of signals related to DBS- $\text{CO}_2\text{H}$  in (b) indicates that all of the gelator has been incorporated into a sample-spanning solid-like network.

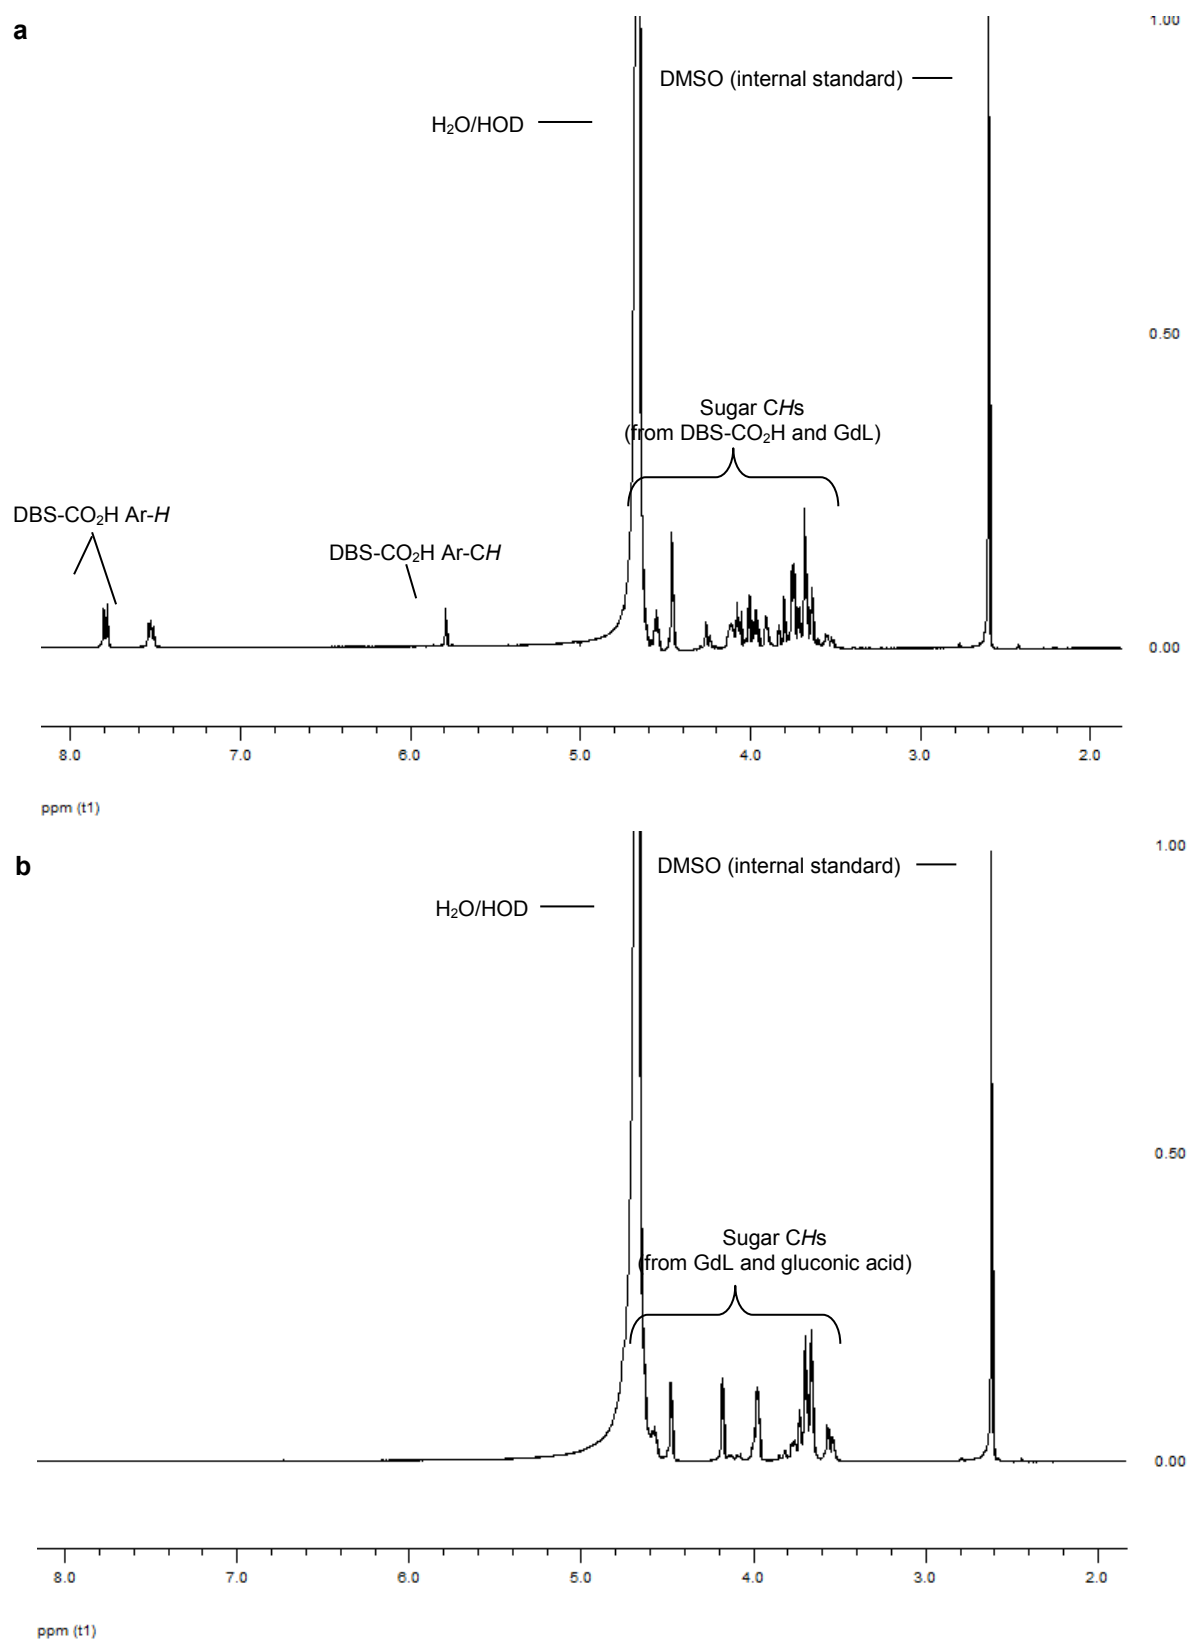

**Figure S4.**  $^1\text{H}$  NMR spectra (400 MHz,  $\text{D}_2\text{O}$ ) of  $\text{DBS-CO}_2\text{H}$ /agarose hybrid gel (0.2% + 0.5% wt/vol) at (a) start of gelation and (b) end of gelation, demonstrating that  $\text{DBS-CO}_2\text{H}$  is capable of assembling into solid-like fibres in the presence of agarose.

## 5. Avrami Plots

The Avrami model expressed in [1],<sup>1</sup> in which  $X(t)$  represents the volume fraction of the gel phase,  $K$  is a temperature dependent constant (similar to a rate constant),  $n$  is the Avrami exponent (which reflects the dimensionality of ‘crystal’ growth) and  $t$  is time, can be rearranged into equation [2]:

$$1 - X(t) = \exp(-Kt^n) \quad [1]$$

$$\ln(\ln(1/1-X(t))) = \ln K + n \ln(t) \quad [2]$$

$$X(t) = (I(\infty) - I(t))/(I(\infty) - I(0)) \quad [3]$$

The volume fraction of the gel phase  $X(t)$  can be expressed in terms of NMR signal intensity at equilibrium ( $I(\infty)$ ), at time  $t$  ( $I(t)$ ) and at the start of the experiment ( $I(0)$ ) using equation [3]. This relationship enables linear fitting of equation [2] to calculate the Avrami exponent  $n$  by plotting  $\ln[-\ln(I(\infty) - I(t))/(I(\infty) - I(0))]$  versus  $\ln(t)$ , where  $n$  is the gradient.<sup>2</sup>

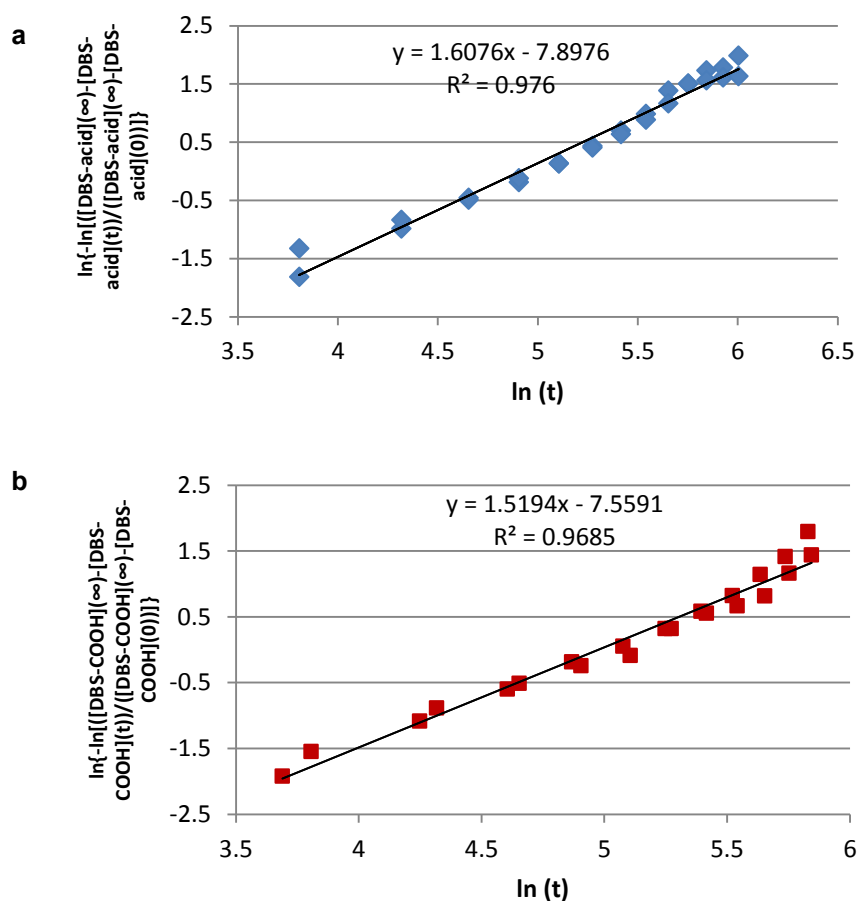

**Figure S5.** Avrami plots for DBS-CO<sub>2</sub>H in (a) the absence of agarose and (b) the presence of agarose.

## 6. CD Spectra

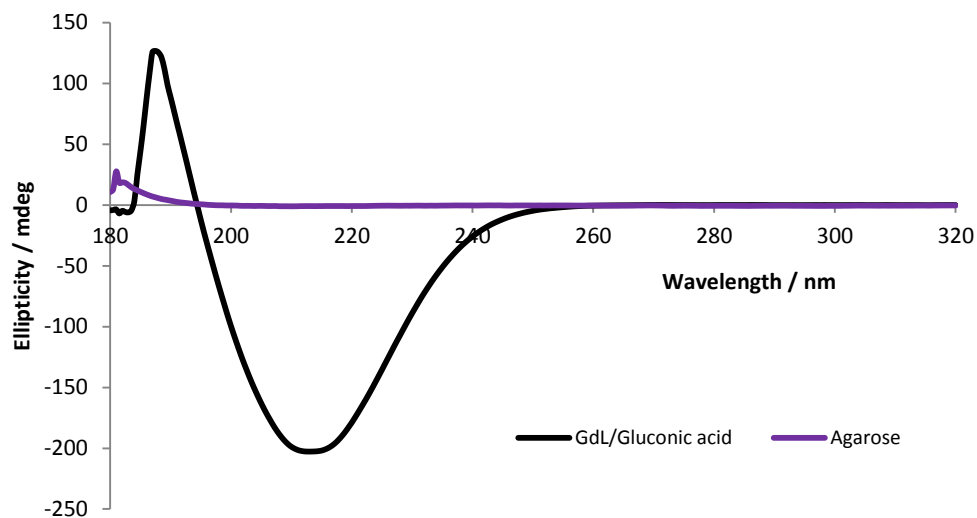

**Figure S6.** CD Spectra of GdL (gluconic acid, black) and agarose (purple) showing that they do not have signals in the same region of the spectrum as DBS-CO<sub>2</sub>H (ca. 260 nm)

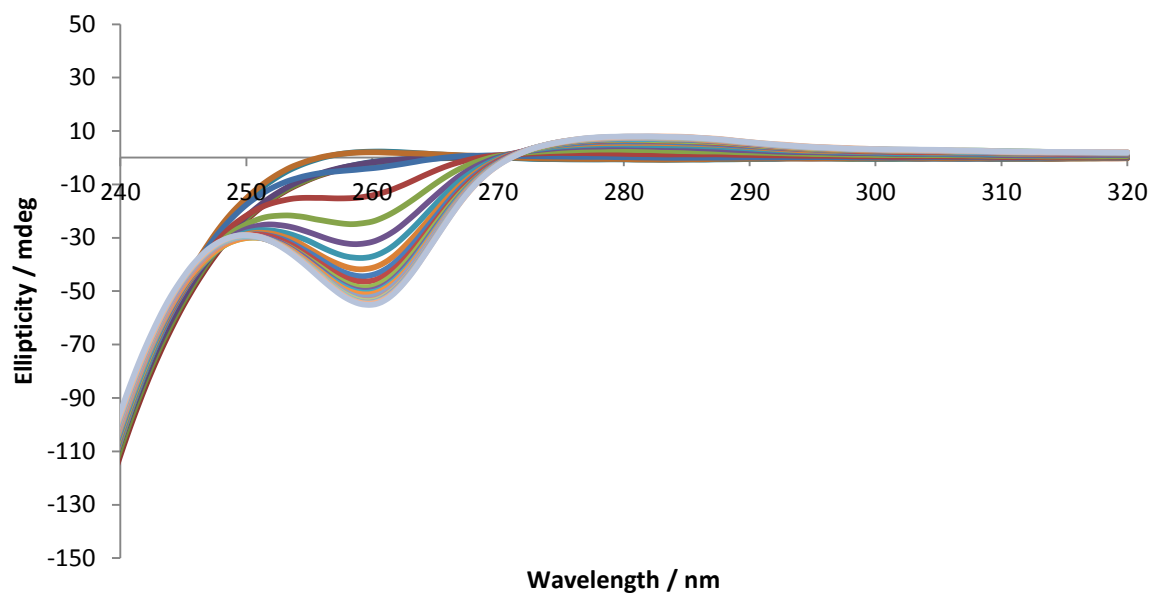

**Figure S7.** Evolution of CD Spectrum of DBS-CO<sub>2</sub>H (0.02% wt/vol) over a two hour period in the absence of agarose

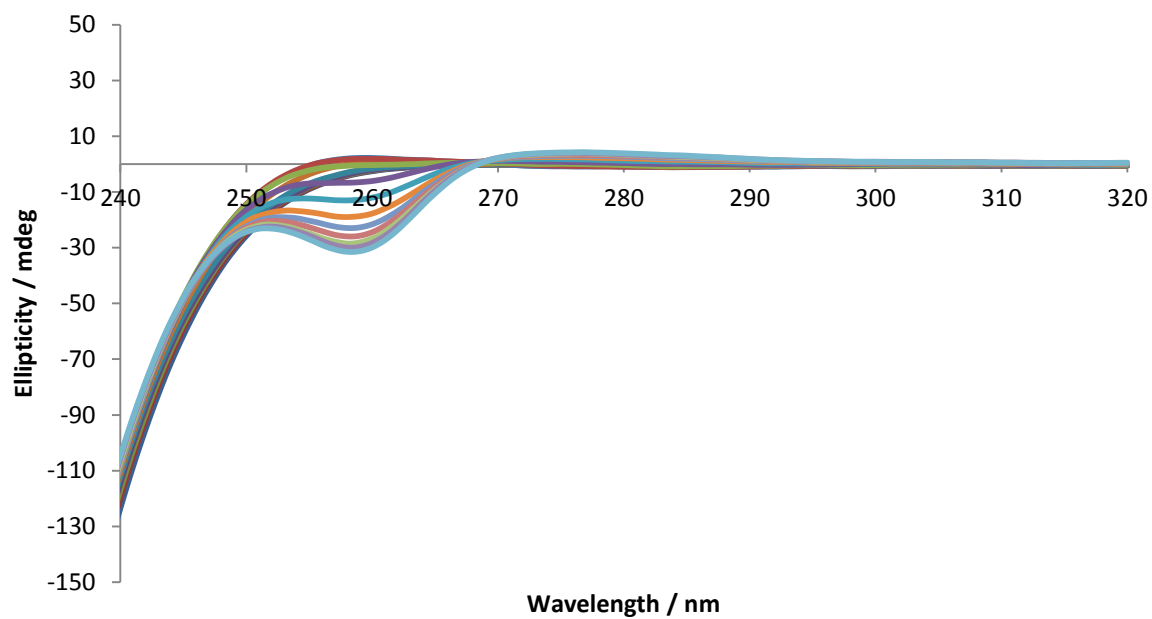

**Figure S8.** Evolution of CD Spectrum of DBS-CO<sub>2</sub>H (0.02% wt/vol) over a two hour period in the presence of agarose (0.05% wt/vol).

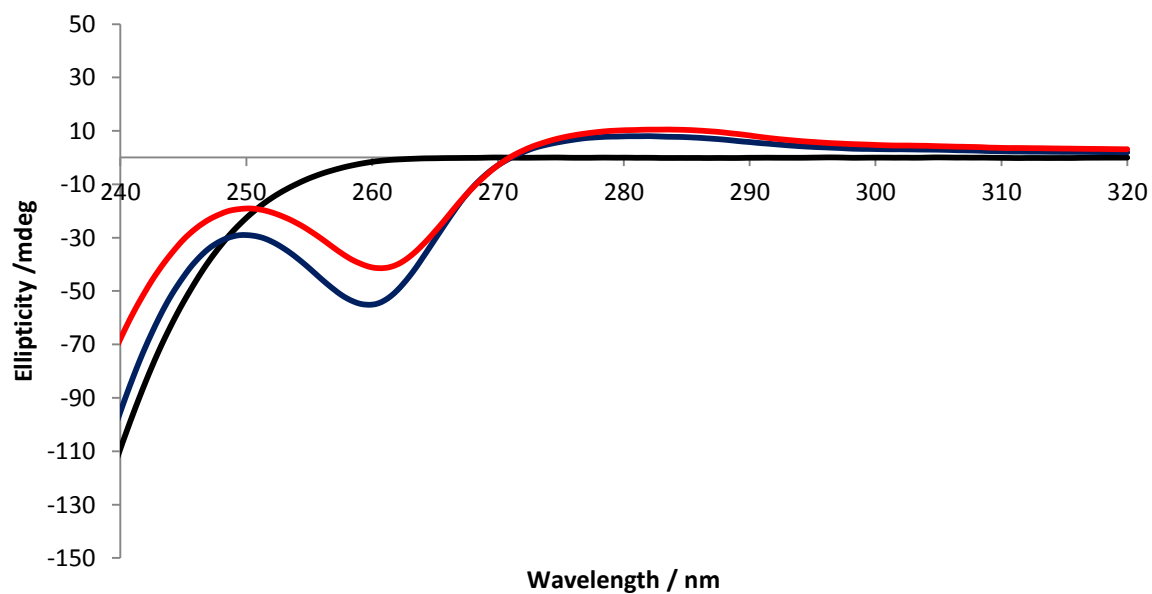

**Figure S9.** CD Spectra of DBS-CO<sub>2</sub>H at 0 h (black), 2 h (blue) and 5 h (red) illustrating further slow reorganisation and decrease in CD ellipticity after 2 h.



## 7. References

1. a) M. Avrami, *J. Chem. Phys.* **1939**, *7*, 1103-1112; b) M. Avrami, *J. Chem. Phys.* **1940**, *8*, 212-224; c) M. Avrami, *J. Chem. Phys.* **1941**, *9*, 177-184.
2. X. Huang, P. Terech, S. R. Raghavan, R. G. Weiss, *J. Am. Chem. Soc.* **2005**, *127*, 4336-4344.
